# Supplementary material
Source: publisher figshare collection journal article supplement (https://tandf.figshare.com/ndownloader/files/14413607)
Supplement: Supplementary file 1 [file 14413607]

Synthesis and Redox Properties of Sterically Crowded Triarylphosphine Bearing Two Phenothiazine Moieties

Shigeru Sasaki,*1 Midori Murakami,1 and Masaaki Yoshifuji1,2

1Department of Chemistry, Graduate School of Science, Tohoku University, Sendai 980-8578, Japan

2Department of Chemistry, The University of Alabama, Tuscaloosa, Alabama 35487-0336, USA

Email: ssasaki@m.tohoku.ac.jp

**Supplemental Materials**


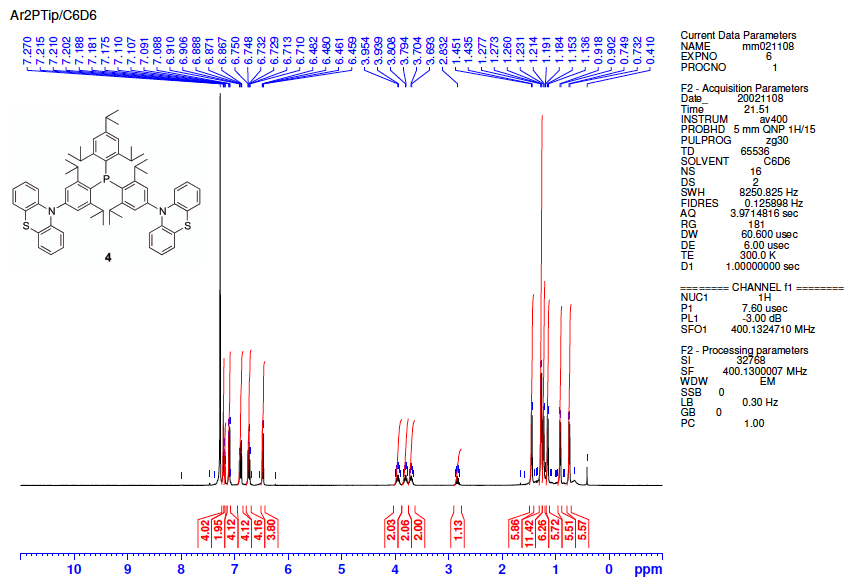


**Figure S 1.** 1H NMR (400 MHz, C6D6, 300 K) spectrum of **4**.


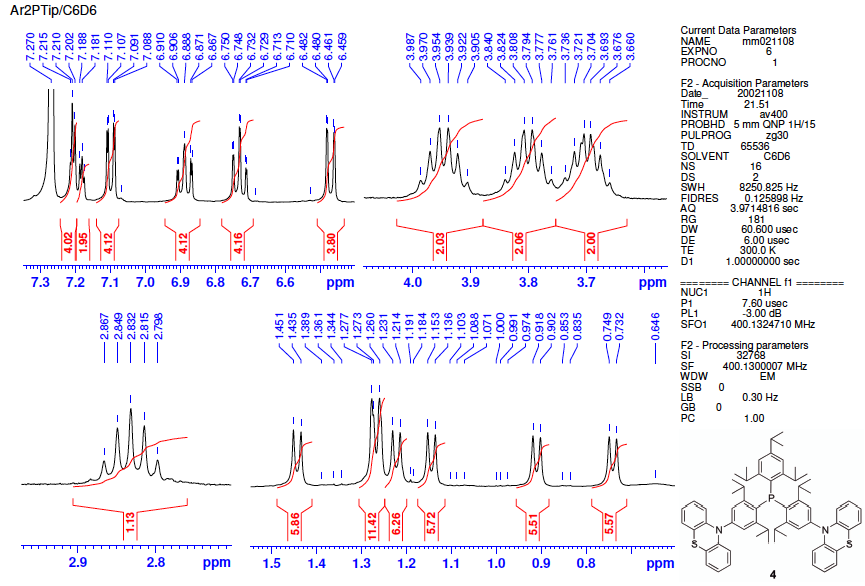


**Figure S 2.** 1H NMR (400 MHz, C6D6, 300 K) spectrum of **4** (expanded plots).


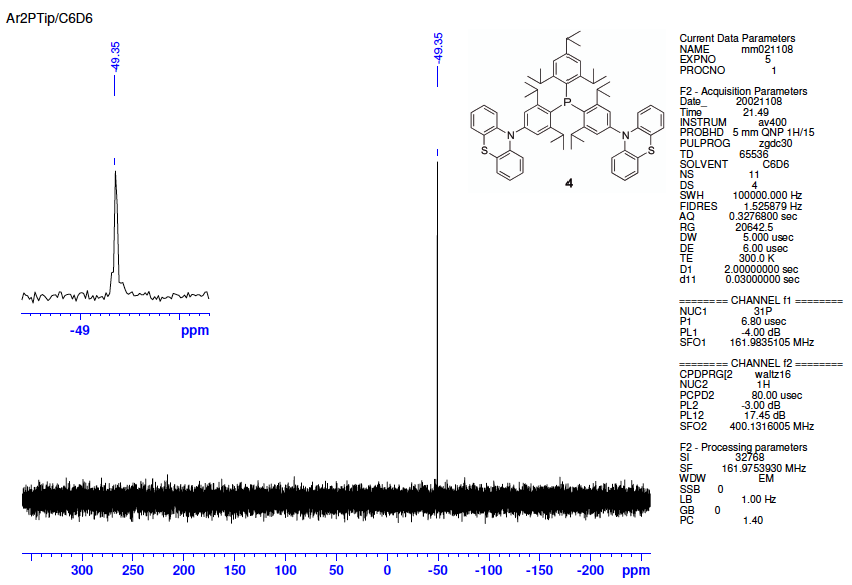


**Figure S 3.** 31P NMR (162 MHz, C6D6, 300 K) spectrum of **4**.


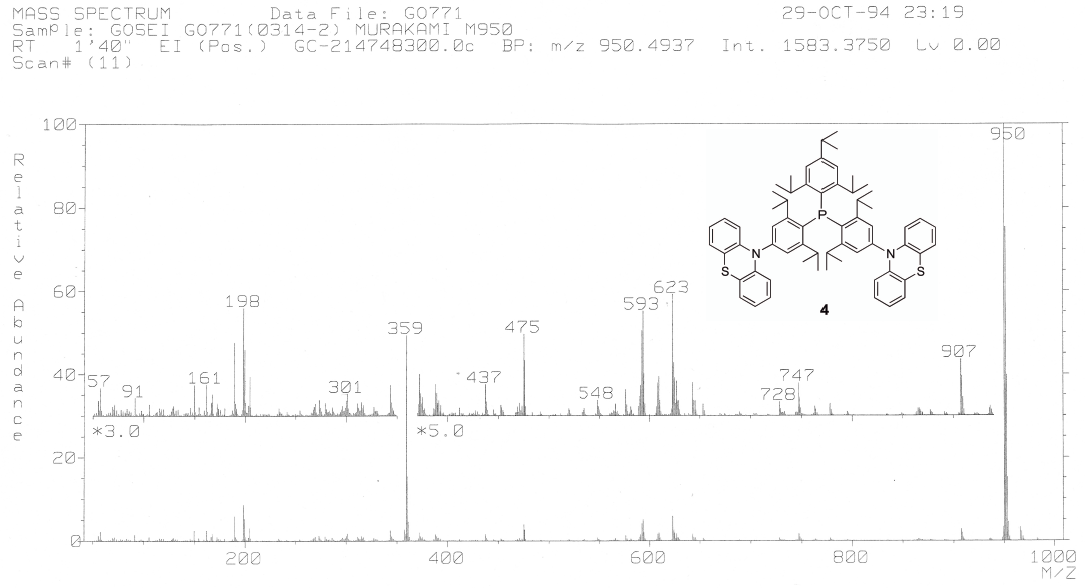


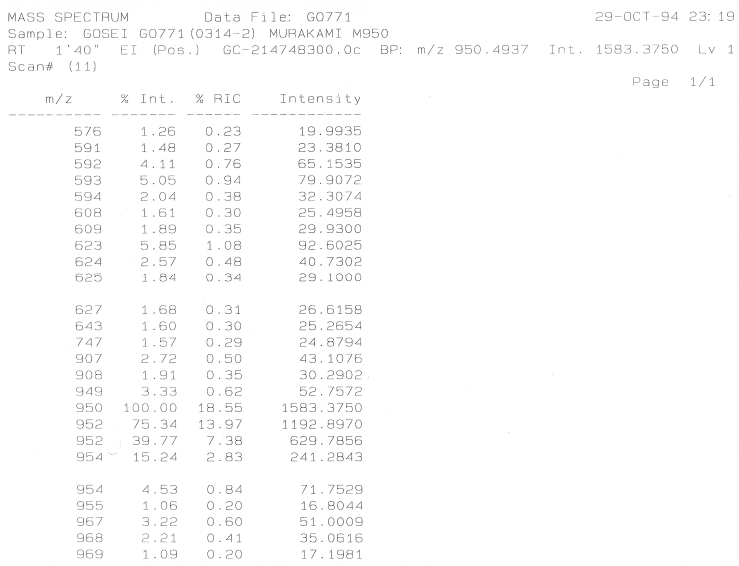


**Figure S 4.** Mass spectrum (EI, 70 eV) of **4**.
